# Supplementary material
Source: Springer Nature journal article supplement (https://www.springermedizin.de/resource/supplementary/12950_2007_48_MOESM1_ESM.pdf/9557830)

**Wild-type**

**P/I Null**

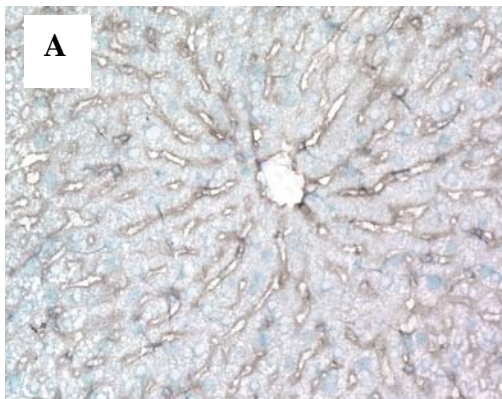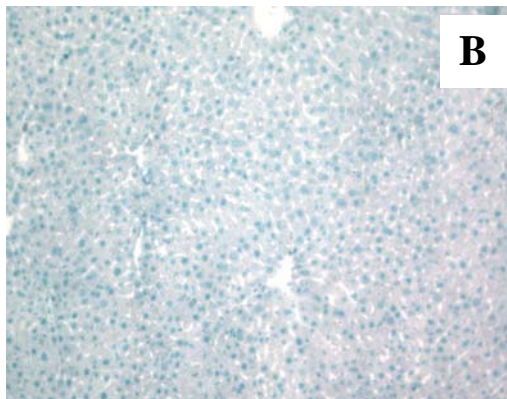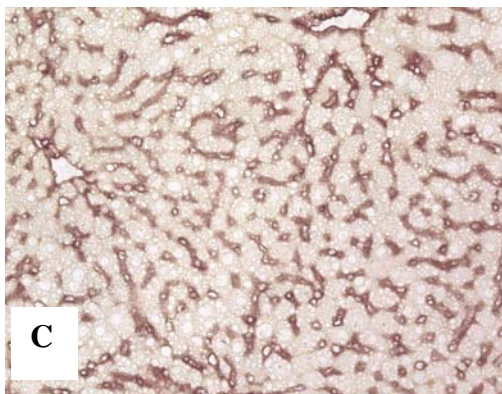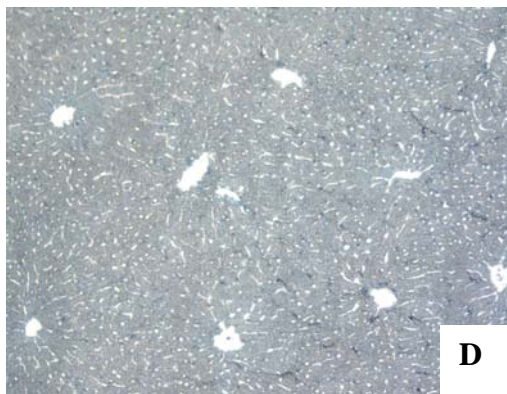

Supplement: MOESM1 [file 9557830]
